# Supplementary material for: An abundant quiescent stem cell population in Drosophila Malpighian tubules protects principal cells from kidney stones
Source: eLife. 2020 Mar 16;9:e54096. doi: 10.7554/eLife.54096 (PMC7093152; doi:10.7554/eLife.54096)
Supplement: Figure 1—source data 1. [file elife-54096-fig1-data1.xlsx]

## Sheet: Figure 1-source data
	Figure 1E						Figure 1F						Figure 1G
	cellular composition of ureter and lower tubule						Nuclear volume (um3)						esg+ cell number in each pair of Malpighian tubules
	esg+ cells	PC_s	PC_l				RSC	PC_s	PC_l				d3	d14	d30	d50	d60
	240	56	78				45.7	59.6	1283				240	200	231	169	81
	297	54	75				32.5	186	1440				297	294	249	90	53
	224	52	96				66.4	211	740				224	232	180	125	126
	267	53	97				31.4	200	1641				267	208	171	75	242
	237	93	80				32.5	189	1475				237	220	199	99	290
	217	49	52				20.5	104	1344				217	269	156	306	194
	222	63	76				68.7	287	1301				222	183	161	94	121
	311	48	96				52.7	204	817				311	271	223	136	91
	335	57	78				24.4	92.4	1371				335	199	207	167	124
	243	39	77				69.6	209	920				243	187	214	157	121
	278	60	76				57.6	220	1220				278		229	202	181
	215	51	64				60.7	293	1263				215				131
	273	61	86				83	290	1258				273
	324	56	132				64.2	199	934				324
	264	62	70				42	123	1417				264
	217	77	76				59.4	191	797				217
	197	43	58				46.5	161	1110				197
	293	65	86				65.3	229	1318				293
	287	46	82				62	113	1463				287
	340	60	56				28.5	119	1610				340
	223	48	60				24.4	94	1309				223
							58.6	461	1433				192
							37.2	428	954				281
							37.7	384	645				249
							41.5	366	1317				213
							44.6	137	2229				226
							41.2	374	1433				201
							31.5	200	2261				294
							36.2	202	2675				295
							32.5	252	1544
							38.7	216	2615
							31.5	186	2482
							36.2	110	1735
							32.5	374	2652
							61.8	197	2004
							47.7	223	1268
							32.8	77.7	1444
							45.1	193	961
							44.6	96.3	1562
							52.8	221	3253
							44.9	192	2401
							50.8	98	2633
							54.3	121	2304
							69.6	181	1945
							57.6	185	1427
							63.6	177	2493
							27.4	187	1186
							70.2	454	2360
							63.1	310	1513
							25.3	270	2830
							76	345	1832
							35.6	299	1837
							52.5	126	2263
							55	169	2125
							41.9	315	2132
							43.9	124	1429
							64.4	159	1434
							37	395	1404
							31.4	199	1483
							48.4	179	1204
							80.8	148	2318
							55.9	166	1322
							76.8		2490
							61.2		1194
							69.1		1305
							64.2		1532
							56.9		852
							80.5		1544
							50.1		1445
							28.8		1017
							31.8		1622
							18.7		1544
							33.4		1202
							36.9		1681
							27.2		970
							18		1670
							24.9		1599
							33.2		1700
							32.2		1593
							40.8		798
							24.7		845
							52.3		1444
							40.9		969
							34.3		956
							22.9		1179
							54.5		863
							45.4		1285
							47.6		1178
							19.6		2560
							47.5		2392
							35.9		2787
							47.2		1378
							40.3		1439
							27		1471
							47.4		1380
							78.9		1867
							61		862
							82.4		1619
							65		737
							70.4		1655
							36.5		871
							48.2		883
							50.1		941
							54.4		809
							33.4		1050
							42.5		858
							41.9		960
							44.4		814
							37.1		798
							30.1		757
							19.6		702
							25.1		870
							46		738
							92.1		824
							88.6		858
							94		1642
							66.6		1014
							68.5		1550
							27.6		1028
							24.2		1567
							17.6		847
							21.8		1605
							68.5		1633
							50.7		722
							24.2		1488
							27.2		1450
							49.9		648
							64		1271
							27.7		995
							72		1193
							64.4		1043
							53.3
							72
							74.6
							45.7
							55.6
							62.7
							58.6
							23.7
							38
							33.2
							52.2
							62.6
							52.4
							90.7
							83.1
							40.7
							65.7
							23.1
							29.2
							20.6
							66.2
							75.3
							58.5
							34.3
							61.7
							45.6
							53.1
							49.6
							47.2
							66.2
							50.8
							41.5
							40.2
