# Supplementary material for: An abundant quiescent stem cell population in Drosophila Malpighian tubules protects principal cells from kidney stones
Source: eLife. 2020 Mar 16;9:e54096. doi: 10.7554/eLife.54096 (PMC7093152; doi:10.7554/eLife.54096)
Supplement: Figure 2—source data 1. [file elife-54096-fig2-data1.xlsx]

## Sheet: Figure 2-source data
	Figure 2G-source data
	Percentage in esg+ cells (%)
	Dl+	NECD+	NRE+
	84.2105	100	0.311526
	94.5946	97.9167	0.757576
	95.4545	100	1.05541
	94.8718	97.5	0
	93.2203	97.2973	1.34228
	97.5	96.6667	0.923077
	92.8571	91.1765	1.2987
	94.4444	100	1.26984
	91.6667	100	0.84507
	84.375
