# Supplementary material for: An abundant quiescent stem cell population in Drosophila Malpighian tubules protects principal cells from kidney stones
Source: eLife. 2020 Mar 16;9:e54096. doi: 10.7554/eLife.54096 (PMC7093152; doi:10.7554/eLife.54096)
Supplement: Figure 3—source data 1. [file elife-54096-fig3-data1.xlsx]

## Sheet: Figure 3-source data
	Figure 3D									Figure 3J
	Nuclear volume of lower tubule PC (um3)									No. of EdU+ esg+ cells
	Ctrl	recover								Intact	Cut within SCZ	<6 PCs away	>10 PCs away
	1850	437								0	7	5	0
	1711	472								1	11	3	0
	816	362								0	10	2	0
	1547	390								0	16	4	1
	1329	277								0	9	7	0
	1714	314								1	13	3	0
	1856	286								0	11	5	0
	1050	405								0	7	5	1
	1601	420								1	12	2	0
	1341	202								0	13	5	0
	1765	396								0	9	3	1
	1762	209								2	5	1	0
	1650	352								0	10	2	0
	1852	178								0	12	3	1
	1614	333								0	7	7	0
	1588	348								1	10	4	0
	1265	182								0	15	6	0
	1497	210								0	8	6	1
	1381	213								0	9	5	0
	1750	222								0		3	1
	1658	212								1			0
	1258	183								1
	1692	204								0
	1954	277
	1761	263
	1676	252
	1115	416
	2608	383
	1900	252
	2763	243
	2617	184
	1417	305
	2453	146
	2048	286
	1005	317
	1875	331
	808	180
	1398	350
	2727	272
	978	161
	1401	282
	2821	245
	1514	178
	1579	238
	1057	188
	1420	157
	1100	208
	1805	213
	3144	253
	1263	397
	1638	434
	1336	267
	1912	222
	1348	227
	1531	208
	1333	174
	1512	384
	1641	209
	1836	160
	1018	367
	1637	195
	1723	217
	3024	237
	1755	187
	3125	219
	1653	218
	1898	345
	3180	295
	1789	256
	1635	298
	1753	376
	1332	361
	2269	291
	3430	372
	1897	311
	1709	412
	1373	397
	1530	244
	1646	393
	1403	269
	1200	406
	1722	300
	1209	302
	1652	193
	1194	270
	1653	428
	1012	389
	1467	193
	2891	179
	2417	281
	1135	202
	1709	367
	1773	349
	1204	316
	1360	180
	1298	115
	1333	130
	1205	164
	1310	255
	2365	367
	2631	136
	1569	173
	1593	324
	2064	154
	2110	189
	3128	151
	2966	391
	2588	210
	2259	422
	1884	372
	2671	397
	2167	212
	3011	189
	3166	438
	3105	205
	1921	398
	2110	421
	2947	403
	3118	369
	2907	437
	2113	397
	1536	226
	3008	376
	1690	431
	2839	478
	1935	274
	1754	170
	1928	202
	1819	182
	1824	318
	1881	206
	1812	168
	1925	350
	3327	399
	1124	484
	2521	455
	1826	260
	2478	274
	1729	198
	2840	260
	2758	261
	2625	252
	1408	274
	2608	478
	2397	383
	1719	183
	1497	247
	1660	175
	1689	196
	1738	201
	1627	385
	1667	411
	1817	347
	1881	243
	1780	423
	1296	400
	1054	222
	1663	224
	1959	385
	1952	249
	1919	258
	1960	220
	2858	222
	1900	182
	2905	187
	1830	193
	1854	254
	1334	328
	1722	310
	3139	343
	1600	177
	1510	347
		375
		233
		231
		274
