# Supplementary material for: An abundant quiescent stem cell population in Drosophila Malpighian tubules protects principal cells from kidney stones
Source: eLife. 2020 Mar 16;9:e54096. doi: 10.7554/eLife.54096 (PMC7093152; doi:10.7554/eLife.54096)
Supplement: Figure 6—source data 1. [file elife-54096-fig6-data1.xlsx]

## Sheet: Figure 6-source data
	Figure 6C					Figure 6E				Figure 6F
	PH3+ cells No. per pair of MTs					% of RSCs incorporate EdU				Cell cycle phase distribution of RSCs assessed by Fly-FUCCI
	esgts>RFP_d3	esgts>upd1_d3				2d (%)	4d (%)				esg-RFP+ No.	E2F-CFP+CycB-GFP-(G1)	E2F-CFP+CycB-GFP+ (G2+M)	E2F-CFP-CycB-GFP+ (S)	E2F-CFP-CycB-GFP1 (G0)
	0	15				0.363636	1.59574			Cell No.	461	45	194	15	217
	0	8				0	1.00671
	0	7				0.522193	0.26455
	0	17				0	0.617284
	0	7				0.60423	0.33557
	0	5				0.284091	2.15827
	0	11				0.334448	1.03806
	0	10				0	2.0979
	0	9				0.282486	0.414938
	0	13				0.387597	1.24688
	0	4				0	2.64151
	0	16				0	1.35135
	0	7				0.544959	0.906344
	0	9				1.00503	1.09589
	0	21				0	1.32275
	0	4				0.258398	0.58651
	0	10				0.33557	0.671141
	0	19				0.534759	0.821918
	0					0.308642
	0					0
	0					0
	0
	0
	0
	0
	0
	0
	0
	0
	0
	0
	0
	0
	0
	0
	0
	0
	0
	0
	0
	0
	0
	0
	0
	0
	0
	0
