# Supplementary material for: An abundant quiescent stem cell population in Drosophila Malpighian tubules protects principal cells from kidney stones
Source: eLife. 2020 Mar 16;9:e54096. doi: 10.7554/eLife.54096 (PMC7093152; doi:10.7554/eLife.54096)
Supplement: Figure 7—source data 1. [file elife-54096-fig7-data1.xlsx]

## Sheet: Figure 7-source data
	Figure 7J
	Life span measurements of control and RSC-depleted animals with or without allopurinol treatment
	days at 29oC	esg>RFP	esg>RFP +Allo	esg>Rac1.DN	esg>Rac1.DN +Allo
	1	131	152	125	140
	3	129	151	123	137
	5	129	151	123	133
	7	127	150	120	124
	9	126	143	118	114
	11	125	138	117	104
	13	123	133	116	96
	15	120	122	115	84
	17	118	106	110	55
	19	115	101	102	42
	21	112	95	91	23
	23	105	76	89	6
	25	96	40	88	0
	27	82	15	81
	29	69	0	68
	31	51		55
	33	35		47
	35	20		39
	37	16		29
	39	11		21
	41	7		9
	43	4		3
	45	0		0
